# Supplementary material
Source: publisher figshare collection journal article supplement (https://rs.figshare.com/ndownloader/files/17855714)
Supplement: Supplementary file 1 [file 17855714]

## Sheet: Sample IDs
Nüesch-Inderbinen et al., (2019) Raw meat-based diets for companion animals: a potential source of transmission of pathogenic and antimicrobial resistant Enterobacteriaceae. Royal Soc Open Sci xxx: xx-xx.
Sample and Strain IDs.
Sample ID	Supplier	Meat	Strain ID	Species
AT 01	A	chicken	AT1SK1	E.coli
AT 02	A	beef	AT2SK1	Citrobacter braakii
AT 03	A	horse	AT3SK1	E.coli
AT 03	A	horse	AT3SK2	E.coli
AT 04	E	beef	AT4SK1	Enterobacter cloacae
AT 04	E	beef	AT4SK2	E.coli
AT 06	D	beef	AT6SK1	E.coli
AT 06	D	beef	AT6SK2	E.coli
AT 08	D	salmon	AT8SK1	E.coli
AT 09	A	duck	AT9SK1	E.coli
AT 09	A	duck	AT9SK2	E.coli
AT 12	E	horse	AT12SK1	E.coli
AT14	E	lamb	AT14SK1	E.coli
AT 15	E	rumen	AT15SK1	E.coli
AT 15	E	rumen	AT15SK2	E.coli
AT 18	B	beef	AT18SK1	E.coli
AT 22	C	turkey	AT22SK1	Klebsiella pneumoniae
AT 22	C	turkey	AT22SK2	E.coli
AT 23	C	lamb	AT23SK1	Enterobacter cloacae
AT 24	C	beef	AT24SK1	E.coli
AT 25	C	rumen	AT25SK1	E.coli
AT 25	C	rumen	AT25SK2	Klebsiella pneumoniae
AT 28	G	chicken	AT28SK1	E.coli
AT 29	G	lamb	AT29SK1	Citrobacter freundii
AT 30	G	beef	AT30SK1	E.coli
AT 31	G	rumen	AT31SK1	Klebsiella pneumoniae
AT 32	G	rabbit	AT32SK1	Enterobacter cloacae
AT 32	G	rabbit	AT32SK2	Enterobacter cloacae
AT 33	G	turkey	AT33SK1	Enterobacter cloacae
AT 34	G	salmon	AT34SK1	Raoultella planticola
AT 36	H	chicken	AT36SK1	E.coli
AT 37	H	lamb	AT37SK1	E.coli
AT 37	H	lamb	AT37SK2	E.coli
AT 38	H	beef	AT38SK1	E.coli
AT 39	H	horse	AT39SK1	E.coli
AT 39	H	horse	AT39SK2	E.coli
AT 40	F	chicken	AT40SK1	E.coli
AT 40	F	chicken	AT40SK2	E.coli
AT 41	F	ostrich	AT41SK1	E.coli
AT 42	F	beef	AT42SK1	E.coli
AT 42	F	beef	AT42SK2	E.coli
AT 43	F	rumen	AT43SK1	E.coli
AT 44	F	elk	AT44SK1	E.coli
AT 45	F	turkey	AT45SK1	E.coli
AT 45	F	turkey	AT45SK2	E.coli
AT 45	F	turkey	AT45SK3	E.coli
AT 46	F	rabbit	AT46SK1	E.coli
AT 46	F	rabbit	AT46SK2	E.coli
AT 47	F	salmon	AT47SK1	E.coli
AT 47	F	salmon	AT47SK2	E.coli
AT 47	F	salmon	AT47SK3	E.coli
AT 49	F	reindeer	AT49SK1	E.coli
AT 49	F	reindeer	AT49SK2	E.coli
AT 50	B	rabbit	AT50SK1	E.coli
AT 50	B	rabbit	AT50SK2	Enterobacter aerogenes
AT 50	B	rabbit	LBA 50-1 SK1	C. freundii
AT 39	H	horse	AT39 SSK1 ()	E.coli
AT 48E27A25:EA1:E59	F	quail	AT48 SSK2 (-5)	E.coli

## Sheet: DD Antibiograms
Nüesch-Inderbinen et al., (2019) Raw meat-based diets for companion animals: a potential source of transmission of pathogenic and antimicrobial resistant Enterobacteriaceae. Royal Soc Open Sci xxx: xx-xx.
Results AST: Disk diffusion (mm).
Lab-ID	Species	AM10	CZ30	CTX30	AMC30	FEP30	NA30	CIP5	SXT	FOS200	AZM15	F/M300	S10	K30	GM10	C30	Te30
AT1SK1	E.coli	6	6	15	20	19	6	22	23	33	15	25	16	23	22	28	6
AT2SK1	Citrobacter braakii	6	6	13	18	23	22	30	6	34	16	28	6	22	21	24	8
AT3SK1	E.coli	6	6	17	20	20	26	36	30	36	16	23	20	23	23	28	7
AT3SK2	E.coli	6	6	16	20	18	26	36	30	36	18	22	18	24	22	26	6
AT4SK1	Enterobacter cloacae	6	6	20	22	24	6	15	25	36	14	20	16	22	22	6	10
AT4SK2	E.coli	6	6	18	9	26	24	28	6	32	16	24	7	6	24	18	6
AT6SK1	E.coli	6	6	24	20	26	28	34	6	34	18	24	7	24	28	28	26
AT6SK2	E.coli	6	6	16	18	22	24	26	6	36	16	22	11	22	20	26	6
AT8SK1	E.coli	6	6	18	20	22	24	36	6	36	18	24	8	6	12	6	6
AT9SK1	E.coli	6	6	12	23	20	6	6	6	32	16	22	7	6	22	8	7
AT9SK2	E.coli	6	6	16	30	28	6	12	6	36	20	26	6	25	25	6	6
AT12SK1	E.coli	6	6	18	20	24	36	38	30	36	18	26	6	6	8	6	6
AT15SK1	E.coli	6	6	15	16	22	6	6	6	34	14	26	8	16	13	30	8
AT15SK2	E.coli	6	6	16	30	26	6	14	32	36	18	28	20	25	24	30	7
AT18SK1	E.coli	6	6	14	22	24	6	6	6	36	16	26	7	24	24	28	8
AT22SK1	Klebsiella pneumoniae	6	6	12	20	20	20	6	6	26	17	20	8	26	24	32	28
AT22SK2	E.coli	6	15	24	20	28	26	40	32	36	18	22	18	20	24	28	26
AT24SK1	E.coli	6	6	18	36	26	26	30	34	36	18	24	18	26	25	30	26
AT25SK1	E.coli	6	6	14	20	20	6	12	30	32	20	22	18	22	22	26	6
AT25SK2	Klebsiella pneumoniae	6	6	16	36	22	24	36	6	24	18	19	17	22	14	7	10
AT28SK1	E.coli	6	6	20	26	26	12	32	34	34	30	24	20	23	25	30	26
AT30SK1	E.coli	6	6	17	22	22	28	32	22	34	18	24	18	23	21	27	8
AT31SK1	Klebsiella pneumoniae	6	6	12	26	20	24	26	6	24	11	18	6	7	25	6	10
AT34SK1	Raoultella planticola	6	13	26	36	32	26	32	6	21	15	26	6	11	6	6	6
AT36SK1	E.coli	6	6	18	20	23	26	36	21	34	18	20	17	21	22	25	25
AT37SK1	E.coli	6	6	10	20	16	22	28	6	36	18	23	8	22	23	27	9
AT37SK2	E.coli	6	6	16	18	20	22	34	28	34	18	23	16	22	22	26	23
AT38SK1	E.coli	6	6	11	20	18	22	32	28	36	28	25	18	22	23	28	25
AT39SK1	E.coli	6	6	13	18	20	26	40	6	37	18	26	20	24	23	26	24
AT39SK2	E.coli	6	6	16	18	24	6	6	6	36	20	24	8	22	22	6	8
AT40SK1	E.coli	6	6	15	20	20	30	40	6	36	18	22	6	22	23	28	24
AT40SK2	E.coli	6	6	15	14	20	6	6	6	32	20	23	11	12	14	6	6
AT41SK1	E.coli	6	6	14	28	22	26	36	22	36	18	25	15	23	23	23	7
AT42SK1	E.coli	6	6	20	20	26	22	40	6	34	18	19	7	22	22	25	9
AT42SK2	E.coli	6	6	11	20	18	8	27	18	34	18	21	6	22	10	28	24
AT43SK1	E.coli	6	6	23	22	26	8	20	34	40	18	25	15	24	24	6	24
AT44SK1	E.coli	6	6	15	18	20	6	6	6	33	18	23	7	6	10	6	6
AT45SK1	E.coli	6	6	15	18	21	8	28	25	34	17	19	11	20	20	25	6
AT45SK2	E.coli	6	6	15	20	21	8	29	25	34	18	21	14	23	23	25	6
AT45SK3	E.coli	6	6	18	20	23	26	40	30	34	18	23	18	23	23	25	24
AT46SK1	E.coli	6	6	18	20	22	8	25	30	26	11	23	17	22	22	6	6
AT46SK2	E.coli	6	6	17	18	20	26	36	6	35	12	23	11	20	21	6	21
AT47SK1	E.coli	6	6	12	18	20	25	40	6	35	18	19	6	22	22	24	6
AT47SK2	E.coli	6	6	16	20	20	26	38	30	32	20	22	18	22	21	25	24
AT47SK3	E.coli	6	6	12	20	20	25	38	6	34	17	20	7	23	22	25	6
AT49SK1	E.coli	6	6	14	22	20	6	6	31	32	17	18	18	22	23	25	6
AT49SK2	E.coli	6	6	15	18	24	16	22	14	34	16	21	10	21	21	6	6
AT50SK1	E.coli	6	6	16	24	22	6	6	6	35	20	23	6	23	22	6	7
AT50SK2	Enterobacter aerogenes	6	6	13	16	16	20	19	6	29	9	18	15	17	20	6	8
AT39 SSK1 ()	E.coli	22	24	32	24	34	6	6	6	32	18	25	6	10	22	24	10
AT48 SSK2 (-5)	E.coli	6	25	36	36	38	32	36	34	38	22	26	11	14	22	26	10
LBA50SK1	Citrobacter freundii	6	17	32	2	36	7	13	6	17	8	21	6	6	6	18	7
AM, ampicillin; AMC, amoxicillin-clavulanic acid; AZM, aztreonam; C, chloramphenicol; CZ, cefazoline; CTX, cefotaxime; CIP, ciprofloxacin; FEP, cefepime; F/M, nitrofurantoin; FOS, fosfomycin; GM, gentamicin; K, kanamycin; NA, nalidixic acid; S, streptomycin; SXT, sulfamethoxazole/trimethoprim; TE, tetracycline.

## Sheet: MLST E. coli
Nüesch-Inderbinen et al., (2019) Raw meat-based diets for companion animals: a potential source of transmission of pathogenic and antimicrobial resistant Enterobacteriaceae. Royal Soc Open Sci xxx: xx-xx.
Results multilocus sequence typing of E. coli isolates: allele numbers and sequence types.
Lab-ID	Species	adk	fumC	gyrB	icd	mdh	purA	recA	ST
AT1SK1	E.coli	6	4	14	16	24	8	14	155
AT3SK1	E.coli	6	4	14	16	24	8	14	155
AT3SK2	E.coli	6	4	14	16	24	8	14	155
AT4SK2	E.coli	10	11	135	8	8	8	2	744
AT6SK2	E.coli	6	4	4	16	24	8	14	58
AT8SK1	E.coli	6	11	4	8	8	8	2	48
AT9SK1	E.coli	10	99	5	91	8	7	2	361
AT9SK2	E.coli	10	11	605	8	8	8	2	7085
AT12SK1	E.coli	10	11	5	8	7	8	6	1434
AT15SK1	E.coli	10	99	5	91	8	7	2	361
AT15SK2	E.coli	10	11	605	8	8	8	2	7085
AT18SK1	E.coli	6	65	3	1	11	13	6	1431
AT22SK2	E.coli	35	3	234	342	5	5	302	5451
AT24SK1	E.coli	6	4	4	16	24	8	14	58
AT25SK1	E.coli	10	11	605	8	8	8	2	7085
AT28SK1	E.coli	6	11	4	234	7	8	6	1594
AT30SK1	E.coli	10	11	4	8	8	8	2	10
AT36SK1	E.coli	6	4	4	16	24	8	14	58
AT37SK1	E.coli	92	580	87	96	70	58	2	4553
AT37SK2	E.coli	6	4	4	16	24	8	14	58
AT38SK1	E.coli	1	1120	44	9	11	9	7	NEW
AT39SK1	E.coli	6	4	12	1	20	13	7	23
AT39SK2	E.coli	6	6	33	26	11	8	2	1196
AT40SK1	E.coli	92	4	87	96	70	58	2	648
AT40SK2	E.coli	6	4	12	1	20	12	7	88
AT41SK1	E.coli	6	6	1	16	9	13	2	109
AT42SK1	E.coli	6	4	4	16	24	8	14	58
AT42SK2	E.coli	6	4	12	1	20	12	7	88
AT43SK1	E.coli	9	6	33	33	24	8	7	86
AT44SK1	E.coli	10	99	5	91	8	7	2	361
AT45SK1	E.coli	20	45	41	43	5	32	2	117
AT45SK2	E.coli	20	45	41	43	5	32	2	117
AT45SK3	E.coli	6	4	544	18	9	26	7	6401
AT46SK1	E.coli	6	4	12	1	20	13	7	23
AT46SK2	E.coli	148	29	5	18	9	351	14	4580
AT47SK1	E.coli	6	4	4	16	24	11	14	2025
AT47SK2	E.coli	168	371	225	30	442	22	2	5597
AT49SK1	E.coli	10	11	4	8	8	13	73	617
AT49SK2	E.coli	6	4	127	16	24	8	6	683
AT50SK1	E.coli	6	4	33	16	11	8	6	224
AT39 SSK1 ()	E.coli	6	65	3	1	11	13	6	1431
AT48 SSK2 (-5)	E.coli	21	35	27	6	5	5	4	69

## Sheet: MLST K. pneumoniae
Nüesch-Inderbinen et al., (2019) Raw meat-based diets for companion animals: a potential source of transmission of pathogenic and antimicrobial resistant Enterobacteriaceae. Royal Soc Open Sci xxx: xx-xx.
Results multilocus sequence typing of Klebsiella pneumoniae isolates: allele numbers and sequence types.
Lab-ID	Species	gapA	infB	mdh	pgi	phoE	rpoB	tonB	ST
AT22SK1	Klebsiella pneumoniae	2	1	1	6	7	1	12	45
AT25SK2	Klebsiella pneumoniae	2	1	1	13	16	15	4	54
AT31SK1	Klebsiella pneumoniae	2	1	2	3	27	1	39	219
